# Supplementary material for: A Comparison of Cut Points for Measuring Risk Factors for Adolescent Substance Use and Antisocial Behaviors in the U.S. and Colombia
Source: MDPI journal article supplement (doi:10.3390/ijerph18020470), 2021-01-06
Supplement: s1 [file s1]

---

# **Risk factors Items and Cut Points**

## **Construct Dictionary**

**Annex 1**

---

## COMMUNITY RISK FACTOR: Community Disorganization

CRCDO (4 point scale) |  $\alpha=0.828$

**CUT POINTS:** 6th grade (COL= 1.676; USA = 1.690) | 8th grade (COL = 2.057; USA = 1.884) | 10th grade (COL = 2.601; USA = 2.628)

| Variable Name                                                                   | Question                              | Scoring                         |
|---------------------------------------------------------------------------------|---------------------------------------|---------------------------------|
| SAFENH                                                                          | I feel safe in my neighborhood.       | NO! (4) no (3) yes (2) YES! (1) |
| <i>How much do each of the following statements describe your neighborhood?</i> |                                       |                                 |
| NHCRIME                                                                         | Crime and/or drug selling.            | NO! (1) no (2) yes (3) YES! (4) |
| NHFIGHT                                                                         | Fights.                               | NO! (1) no (2) yes (3) YES! (4) |
| NHEMPTY                                                                         | Lots of empty or abandoned buildings. | NO! (1) no (2) yes (3) YES! (4) |
| NHGRAFF                                                                         | Lots of graffiti.                     | NO! (1) no (2) yes (3) YES! (4) |

## COMMUNITY RISK FACTOR: Perceived Availability of Drugs

CRPAD (4 point scale) |  $\alpha=0.867$

**CUT POINTS:** 6th grade (COL = 1.588); USA = 1.064) | 8th grade (COL = 2.104; USA = 1.861) | 10th grade (COL = 1.879; USA = 2.081)

| Variable Name | Question                                                                                                                            | Scoring                                                       |
|---------------|-------------------------------------------------------------------------------------------------------------------------------------|---------------------------------------------------------------|
| GETCIG        | If you wanted to get some cigarettes, how easy would it be for you to get some?                                                     | Very Hard (1) Sort of Hard (2) Sort of Easy (3) Very Easy (4) |
| GETALC        | If you wanted to get some beer, wine or hard liquor (for example, vodka, whiskey or gin), how easy would it be for you to get some? | Very Hard (1) Sort of Hard (2) Sort of Easy (3) Very Easy (4) |
| GETMAR        | If you wanted to get some marijuana, how easy would it be for you to get some?                                                      | Very Hard (1) Sort of Hard (2) Sort of Easy (3) Very Easy (4) |
| GETDRUG       | If you wanted to get a drug like cocaine, LSD, or amphetamines, how easy would it be for you to get some?                           | Very Hard (1) Sort of Hard (2) Sort of Easy (3) Very Easy (4) |

*Note.* COL = Cut point based on the distributions of risk factors observed in the Colombian data; USA = U.S.-based cut point

## COMMUNITY RISK FACTOR: Perceived Availability of Handguns

CRPAG (4 point scale) |  $\alpha=N/A$

**CUT POINTS:** 6th grade (COL = 1.053; USA = 1.068) | 8th grade (COL = 1.084; USA = 1.097) | 10th grade (COL = 1.101; USA = 1.136)

| Variable Name | Question                                                                 | Scoring                                                       |
|---------------|--------------------------------------------------------------------------|---------------------------------------------------------------|
| GETGUN        | If you wanted to get a handgun, how easy would it be for you to get one? | Very Hard (1) Sort of Hard (2) Sort of Easy (3) Very Easy (4) |

## COMMUNITY RISK FACTOR: Laws and Norms Favorable to Drug Use

CRLNFD (4 point scale) |  $\alpha=0.823$

**CUT POINTS:** 6th grade (COL = 2.2106; USA = 1.568) | 8th grade (COL = 2.344; USA = 2.076) | 10th grade (COL = 2.481; USA = 2.277)

| Variable Name | Question                                                                                                                                         | Scoring                                                              |
|---------------|--------------------------------------------------------------------------------------------------------------------------------------------------|----------------------------------------------------------------------|
| POLALC        | If a kid drank some beer, wine or hard liquor (for example, vodka, whiskey or gin) in your neighborhood would he or she be caught by the police? | NO! (4) no (3) yes (2) YES! (1)                                      |
| POLMAR        | If a kid smoked marijuana in your neighborhood would he or she be caught by the police?                                                          | NO! (4) no (3) yes (2) YES! (1)                                      |
| POLGUN        | If a kid carried a handgun in your neighborhood would he or she be caught by the police?                                                         | NO! (4) no (3) yes (2) YES! (1)                                      |
| POLCIG        | If a kid smoked a cigarette in your neighborhood would he or she be caught by the police?*                                                       | NO! (4) no (3) yes (2) YES! (1)                                      |
|               | <b><i>How wrong would most adults (over 21) in your neighborhood think it is for kids your age...</i></b>                                        |                                                                      |
| AWRMAR        | ...to use marijuana?                                                                                                                             | Very Wrong (1) Wrong (2) A Little Bit Wrong (3) Not Wrong at All (4) |
| AWRALC        | ...to drink alcohol?                                                                                                                             | Very Wrong (1) Wrong (2) A Little Bit Wrong (3) Not Wrong at All (4) |
| AWRCIG        | ...to smoke cigarettes?                                                                                                                          | Very Wrong (1) Wrong (2) A Little Bit Wrong (3) Not Wrong at All (4) |

*Note.* COL = Cut point based on the distributions of risk factors observed in the Colombian data; USA = U.S.-based cut point

## FAMILY RISK FACTOR: Family History of Antisocial Behavior

FRFAB (5 point scale) |  $\alpha=0.825$

**CUT POINTS:** 6th grade (COL = 1.468; USA = 1.362) | 8th grade (COL = 1.477; USA = 1.710) | 10th grade (COL = 1.533; USA = 2.131)

| Variable Name | Question                                                                                                                                    | Scoring                                                 |             |              |                   |                      |
|---------------|---------------------------------------------------------------------------------------------------------------------------------------------|---------------------------------------------------------|-------------|--------------|-------------------|----------------------|
| FAMPROB       | Has anyone in your family ever had a severe alcohol or drug problem?                                                                        | No (1) Yes (5)                                          |             |              |                   |                      |
|               | <i>Have any of your brothers or sisters ever...</i>                                                                                         |                                                         |             |              |                   |                      |
| SIBALC        | ...drunk beer, wine or hard liquor (for example, vodka, whiskey or gin)?                                                                    | No (1) Yes (5) I Don't Have Any Brothers or Sisters (0) |             |              |                   |                      |
| SIBMAR        | ...smoked marijuana?                                                                                                                        | No (1) Yes (5) I Don't Have Any Brothers or Sisters (0) |             |              |                   |                      |
| SIBCIG        | ...smoked cigarettes?                                                                                                                       | No (1) Yes (5) I Don't Have Any Brothers or Sisters (0) |             |              |                   |                      |
| SIBGUN        | ...taken a handgun to school?                                                                                                               | No (1) Yes (5) I Don't Have Any Brothers or Sisters (0) |             |              |                   |                      |
| SIBSUS        | ...been suspended or expelled from school?                                                                                                  | No (1) Yes (5) I Don't Have Any Brothers or Sisters (0) |             |              |                   |                      |
|               | <i>About how many adults (over 21) have you known personally who in the past year have...</i>                                               |                                                         |             |              |                   |                      |
| ADUDRUG       | ...used marijuana, crack, cocaine, or other drugs?                                                                                          | None (1)                                                | 1 adult (2) | 2 adults (3) | 3 or 4 adults (4) | 5 or more adults (5) |
| ADSDRUG       | ...sold or dealt drugs?                                                                                                                     | None (1)                                                | 1 adult (2) | 2 adults (3) | 3 or 4 adults (4) | 5 or more adults (5) |
| ADSTEAL       | ...done other things that could get them in trouble with the police like stealing, selling stolen goods, mugging or assaulting others, etc. | None (1)                                                | 1 adult (2) | 2 adults (3) | 3 or 4 adults (4) | 5 or more adults (5) |
| ADDRUNK       | ...gotten drunk or high?                                                                                                                    | None (1)                                                | 1 adult (2) | 2 adults (3) | 3 or 4 adults (4) | 5 or more adults (5) |

*Note.* COL = Cut point based on the distributions of risk factors observed in the Colombian data; USA = U.S.-based cut point

## FAMILY RISK FACTOR: Poor Family Management

FRPFM (4 point scale) |  $\alpha=0.857$

**CUT POINTS:** 6th grade (COL = 1.568; USA = 1.312) | 8th grade (COL = 1.814; USA<sub>2</sub>=1.701) | 10th grade (COL = 1.811; USA = 1.953)

| Variable Name | Question                                                                                                                                                  | Scoring                         |
|---------------|-----------------------------------------------------------------------------------------------------------------------------------------------------------|---------------------------------|
| FAMRULE       | The rules in my family are clear.                                                                                                                         | NO! (4) no (3) yes (2) YES! (1) |
| HMWORK        | My parents ask if I've gotten my homework done.                                                                                                           | NO! (4) no (3) yes (2) YES! (1) |
| PARKNOW       | When I am not at home, one of my parents knows where I am and who I am with.                                                                              | NO! (4) no (3) yes (2) YES! (1) |
| CMHOME        | Would your parents know if you did not come home on time?                                                                                                 | NO! (4) no (3) yes (2) YES! (1) |
| CLRRULE       | My family has clear rules about alcohol and drug use.                                                                                                     | NO! (4) no (3) yes (2) YES! (1) |
| CATCHAL       | If you drank some beer or wine or hard liquor (for example, vodka, whiskey or gin) without your parents' permission, would you be caught by your parents? | NO! (4) no (3) yes (2) YES! (1) |
| CATCHGN       | If you carried a handgun without your parents' permission, would you be caught by your parents?                                                           | NO! (4) no (3) yes (2) YES! (1) |
| CATCHSK       | If you skipped school, would you be caught by your parents?                                                                                               | NO! (4) no (3) yes (2) YES! (1) |

## FAMILY RISK FACTOR: Family Conflict

FRFC (4 point scale) |  $\alpha=0.804$

**CUT POINTS:** 6th grade (COL = 2.084; USA = 2.099) | 8th grade (COL = 2.084; USA = 2.098) | 10th grade (COL = 2.074; USA = 2.427)

| Variable Name | Question                                                   | Scoring                         |
|---------------|------------------------------------------------------------|---------------------------------|
| ARGUE         | We argue about the same things in my family over and over. | NO! (1) no (2) yes (3) YES! (4) |
| SERARG        | People in my family have serious arguments.                | NO! (1) no (2) yes (3) YES! (4) |
| FAMYELL       | People in my family often insult or yell at each other.    | NO! (1) no (2) yes (3) YES! (4) |

*Note.* COL = Cut point based on the distributions of risk factors observed in the Colombian data; USA = U.S.-based cut point

## FAMILY RISK FACTOR: Parental Attitudes Favorable Toward Drug Use

FRPFD (4 point scale) |  $\alpha=0.799$

**CUT POINTS:** 6th grade (COL = 1.036; USA = 1.013) | 8th grade (COL = 1.053; USA = 1.029) | 10th grade (COL = 1.388; USA = 1.064)

| Variable Name | Question                                                                                                            | Scoring                                                                    |
|---------------|---------------------------------------------------------------------------------------------------------------------|----------------------------------------------------------------------------|
|               | <i>How wrong do your parents feel it would be for <u>you</u> to...</i>                                              |                                                                            |
| WRPRALC       | ...drink beer, wine or hard liquor (for example, vodka, whiskey or gin) regularly (at least once or twice a month)? | Very Wrong (1)   Wrong (2)   A Little Bit Wrong (3)   Not Wrong at All (4) |
| WRPRCIG       | ...smoke cigarettes?                                                                                                | Very Wrong (1)   Wrong (2)   A Little Bit Wrong (3)   Not Wrong at All (4) |
| WRPRMAR       | ...smoke marijuana?                                                                                                 | Very Wrong (1)   Wrong (2)   A Little Bit Wrong (3)   Not Wrong at All (4) |

## FAMILY RISK FACTOR: Parental Attitudes Favorable to Antisocial Behavior

FRPAB (4 point scale) |  $\alpha=0.733$

**CUT POINTS:** 6th grade (COL = 1.048; USA = 1.040) | 8th grade (COL = 1.397; USA<sub>2</sub> = 1.059) | 10th grade (COL = 1.393; USA = 1.396)

| Variable Name | Question                                                                                                            | Scoring                                                                    |
|---------------|---------------------------------------------------------------------------------------------------------------------|----------------------------------------------------------------------------|
|               | <i>How wrong do your parents feel it would be for <u>you</u> to...</i>                                              |                                                                            |
| WRPRSTL       | ...steal something worth more than \$5?                                                                             | Very Wrong (1)   Wrong (2)   A Little Bit Wrong (3)   Not Wrong at All (4) |
| WRPRDRW       | ...draw graffiti, or write things or draw pictures on buildings or other property (without the owner's permission)? | Very Wrong (1)   Wrong (2)   A Little Bit Wrong (3)   Not Wrong at All (4) |
| WRPRFGT       | ...pick a fight with someone?                                                                                       | Very Wrong (1)   Wrong (2)   A Little Bit Wrong (3)   Not Wrong at All (4) |

*Note.* COL = Cut point based on the distributions of risk factors observed in the Colombian data; USA = U.S.-based cut point

## SCHOOL RISK FACTOR: Low Commitment to School

SRLCS (4 point scale) |  $\alpha=0.793$

**CUT POINTS:** 6th grade (COL = 1.781; USA = 2.075) | 8th grade (COL = 2.071; USA = 2.365) | 10th grade (COL = 2.065; USA = 2.509)

| Variable Name | Question                                                                                               | Scoring                                                                                                               |
|---------------|--------------------------------------------------------------------------------------------------------|-----------------------------------------------------------------------------------------------------------------------|
| MISSC         | During the LAST FOUR WEEKS how many whole days of school have you missed because you skipped or “cut”? | None (1) 1 (1.67) 2 (2.33) 3 (3) 4-5 (3.67) 6-10 (4.33) 11 or more (5)                                                |
| SCHIMP        | How often do you feel that the schoolwork you are assigned is meaningful and important?                | Never (5) Seldom (4) Sometimes (3) Often (2) Almost Always (1)                                                        |
| SCHINT        | How interesting are most of your courses to you?                                                       | Very Interesting And stimulating (1) Quite Interesting (2) Fairly Interesting (3) Slightly Boring (4) Very Boring (5) |
| SCHLRN        | How important do you think the things you are learning in school are going to be for your later life?  | Very Important (1) Quite Important (2) Fairly Important (3) Slightly Important (4) Not at all Important (5)           |
|               | <b><i>Now, thinking back over the past year in school, how often did you...</i></b>                    |                                                                                                                       |
| ENJSCH        | ...enjoy being in school?                                                                              | Never (5) Seldom (4) Sometimes (3) Often (2) Almost Always (1)                                                        |
| HTSCH         | ...hate being in school?                                                                               | Never (1) Seldom (2) Sometimes (3) Often (4) Almost Always (5)                                                        |
| BWSCH         | ...try to do your best work in school?                                                                 | Never (5) Seldom (4) Sometimes (3) Often (2) Almost Always (1)                                                        |

*Note.* COL = Cut point based on the distributions of risk factors observed in the Colombian data; USA = U.S.-based cut point

## PEER-INDIVIDUAL RISK FACTOR: Gang Involvement

PRGI (9 point scale) |  $\alpha=0.873$

**CUT POINTS:** 6th grade (COL = 0.06; USA = 0.041) | 8th grade (COL = 0.071; USA = 0.063) | 10th grade (COL = 0.063; USA = 0.057)

| Variable Name | Question                                                                   | Scoring                                                                                                 |
|---------------|----------------------------------------------------------------------------|---------------------------------------------------------------------------------------------------------|
| GANG          | Have you ever belonged to a gang?                                          | No (0) Yes (8)                                                                                          |
| GANGNM        | If you have ever belonged to a gang, did the gang have a name?             | No (1) Yes (8) I have never belonged to a gang (0)                                                      |
|               | <i>In the past year (12 months), how many of your best friends have...</i> |                                                                                                         |
| FRGANG        | ...been members of a gang?                                                 | None of my friends (0) 1 of my friends (1) 2 of my friends (2) 3 of my friends (3) 4 of my friends (4)F |
|               | <i>How old were you when you first...</i>                                  |                                                                                                         |
| AGEGANG       | ...belonged to a gang?                                                     | Never Have (0) 10 or Younger (8) 11 (7) 12 (6) 13 (5) 14 (4) 15 (3) 16 (2) 17 or Older (1)              |

## PEER-INDIVIDUAL RISK FACTOR: Perceived Risks of Drug Use

PRPRD (4 point scale) |  $\alpha=0.820$

**CUT POINTS:** 6th grade (COL = 1.781; USA = 2.075) | 8th grade (COL = 2.071; USA = 2.365) | 10th grade (COL = 2.065; USA = 2.509)

| Variable Name | Question                                                                                             | Scoring                                                      |
|---------------|------------------------------------------------------------------------------------------------------|--------------------------------------------------------------|
|               | <i>How much do you think people risk harming themselves (physically or in other ways) if they...</i> |                                                              |
| HMCIG         | ...smoke one or more packs of cigarettes per day?                                                    | No risk (4) Slight Risk (3) Moderate Risk (2) Great Risk (1) |
| HMMARO        | ...try marijuana once or twice?                                                                      | No risk (4) Slight Risk (3) Moderate Risk (2) Great Risk (1) |
| HMMARR        | ...smoke marijuana regularly?                                                                        | No risk (4) Slight Risk (3) Moderate Risk (2) Great Risk (1) |
| HMALC         | ...take one or two drinks of an alcoholic beverage (beer, wine, or liquor) nearly every day?         | No risk (4) Slight Risk (3) Moderate Risk (2) Great Risk (1) |

Note. COL = Cut point based on the distributions of risk factors observed in the Colombian data; USA = U.S.-based cut point



## PEER-INDIVIDUAL RISK FACTOR: Early Initiation of Drug Use

PREID (9-point scale) |  $\alpha=0.801$

**CUT POINTS:** 6th grade (COL = 0.091; USA = 0.093) | 8th grade (COL = 0.124; USA = 0.194) | 10th grade (COL = 0.121; USA = 0.111)

| Variable Name | Question                                                                                         | Scoring           |                      |           |           |           |           |           |           |                    |
|---------------|--------------------------------------------------------------------------------------------------|-------------------|----------------------|-----------|-----------|-----------|-----------|-----------|-----------|--------------------|
|               | <i>How old were you when you first...</i>                                                        |                   |                      |           |           |           |           |           |           |                    |
| AGECIG        | ...smoked a cigarette, even just a puff?                                                         | Never<br>Have (0) | 10 or<br>Younger (8) | 11<br>(7) | 12<br>(6) | 13<br>(5) | 14<br>(4) | 15<br>(3) | 16<br>(2) | 17 or<br>Older (1) |
| AGEALC        | ...had more than a sip or two of beer, wine or hard liquor (for example, vodka, whiskey or gin)? | Never<br>Have (0) | 10 or<br>Younger (8) | 11<br>(7) | 12<br>(6) | 13<br>(5) | 14<br>(4) | 15<br>(3) | 16<br>(2) | 17 or<br>Older (1) |
| AGEALCR       | ...began drinking alcoholic beverages regularly, that is, at least once or twice a month?        | Never<br>Have (0) | 10 or<br>Younger (8) | 11<br>(7) | 12<br>(6) | 13<br>(5) | 14<br>(4) | 15<br>(3) | 16<br>(2) | 17 or<br>Older (1) |
| AGEMAR        | ...smoked marijuana?                                                                             | Never<br>Have (0) | 10 or<br>Younger (8) | 11<br>(7) | 12<br>(6) | 13<br>(5) | 14<br>(4) | 15<br>(3) | 16<br>(2) | 17 or<br>Older (1) |

## PEER-INDIVIDUAL RISK FACTOR: Favorable Attitudes Toward Drug Use

PRFAD (4-point scale) |  $\alpha=0.864$

**CUT POINTS:** 6th grade (COL = 1.314; USA = 1.020) | 8th grade (COL = 1.578; USA = 1.060) | 10th grade (COL = 1.825; USA = 1.594)

| Variable Name | Question                                                                                                                    | Scoring        |           |                        |                      |
|---------------|-----------------------------------------------------------------------------------------------------------------------------|----------------|-----------|------------------------|----------------------|
|               | <i>How wrong do you think it is for someone your age to...</i>                                                              |                |           |                        |                      |
| WRALC         | ...drink beer, wine or hard liquor (for example, vodka, whiskey or gin) regularly, that is, at least once or twice a month? | Very Wrong (1) | Wrong (2) | A Little Bit Wrong (3) | Not Wrong at All (4) |
| WRCIG         | ...smoke cigarettes?                                                                                                        | Very Wrong (1) | Wrong (2) | A Little Bit Wrong (3) | Not Wrong at All (4) |
| WRMAR         | ...smoke marijuana?                                                                                                         | Very Wrong (1) | Wrong (2) | A Little Bit Wrong (3) | Not Wrong at All (4) |
| WRDRUG        | ...use LSD, cocaine, amphetamines or another illegal drug?                                                                  | Very Wrong (1) | Wrong (2) | A Little Bit Wrong (3) | Not Wrong at All (4) |

*Note.* COL = Cut point based on the distributions of risk factors observed in the Colombian data; USA = U.S.-based cut point

## PEER-INDIVIDUAL RISK FACTOR: Favorable Attitudes Toward Antisocial Behavior

PRATA (4 point scale) |  $\alpha=0.829$

**CUT POINTS:** 6th grade (COL = 1.257; USA = 1.248) | 8th grade (COL = 1.465; USA = 1.467) | 10th grade (COL = 1.462; USA = 1.668)

| Variable Name | Question                                                                      | Scoring                                                                    |
|---------------|-------------------------------------------------------------------------------|----------------------------------------------------------------------------|
|               | <i>How wrong do you think it is for someone your age to...</i>                |                                                                            |
| WRGUN         | ...take a handgun to school?                                                  | Very Wrong (1)   Wrong (2)   A Little Bit Wrong (3)   Not Wrong at All (4) |
| WRSTL         | ...steal something worth more than \$5?                                       | Very Wrong (1)   Wrong (2)   A Little Bit Wrong (3)   Not Wrong at All (4) |
| WRATT         | ...attack someone with the idea of seriously hurting them?                    | Very Wrong (1)   Wrong (2)   A Little Bit Wrong (3)   Not Wrong at All (4) |
| WRFGT         | ...pick a fight with someone?                                                 | Very Wrong (1)   Wrong (2)   A Little Bit Wrong (3)   Not Wrong at All (4) |
| WRSKIP        | ...stay away from school all day when their parents think they are at school? | Very Wrong (1)   Wrong (2)   A Little Bit Wrong (3)   Not Wrong at All (4) |

## PEER-INDIVIDUAL RISK FACTOR: Friends' Use of Drugs

PRFUD (5 point scale) |  $\alpha=0.853$

**CUT POINTS:** 6th grade (COL = 0.078; USA = 0.025) | 8th grade (COL = 0.872; USA = 0.091) | 10th grade (COL = 1.123; USA = 0.895)

| Variable Name | Question                                                                                                         | Scoring                                                                                                        |
|---------------|------------------------------------------------------------------------------------------------------------------|----------------------------------------------------------------------------------------------------------------|
|               | <i>In the past year (12 months), how many of your best friends have...</i>                                       |                                                                                                                |
| FRCIG         | ...smoked cigarettes?                                                                                            | None of my friends (0)   1 of my friends (1)   2 of my friends (2)   3 of my friends (3)   4 of my friends (4) |
| FRALC         | ...tried beer, wine or hard liquor (for example, vodka, whiskey or gin) when their parents didn't know about it? | None of my friends (0)   1 of my friends (1)   2 of my friends (2)   3 of my friends (3)   4 of my friends (4) |
| FRMAR         | ...used marijuana?                                                                                               | None of my friends (0)   1 of my friends (1)   2 of my friends (2)   3 of my friends (3)   4 of my friends (4) |
| FRDRUG        | ...used LSD, cocaine, amphetamines or other illegal drugs?                                                       | None of my friends (0)   1 of my friends (1)   2 of my friends (2)   3 of my friends (3)   4 of my friends (4) |

*Note.* COL = Cut point based on the distributions of risk factors observed in the Colombian data; USA = U.S.-based cut point

## PEER-INDIVIDUAL RISK FACTOR: Rewards for Antisocial Involvement

PRRAI (5-point scale) |  $\alpha=0.841$

**CUT POINTS:** 6th grade (COL = 1.044; USA = 1.040) | 8th grade (COL = 1.084; USA = 1.086) | 10th grade (COL = 1.347; USA = 1.782)

| Variable Name | Question                                                                                     | Scoring                         |                      |                    |                           |                         |
|---------------|----------------------------------------------------------------------------------------------|---------------------------------|----------------------|--------------------|---------------------------|-------------------------|
|               | <i><b>What are the chances you would be seen as cool if you...</b></i>                       |                                 |                      |                    |                           |                         |
| COOLCIG       | ...smoked cigarettes?                                                                        | No or Very<br>Little Chance (1) | Little<br>Chance (2) | Some<br>Chance (3) | Pretty Good<br>Chance (4) | Very Good<br>Chance (5) |
| COOLALC       | ...began drinking alcoholic beverages regularly,<br>that is, at least once or twice a month? | No or Very<br>Little Chance (1) | Little<br>Chance (2) | Some<br>Chance (3) | Pretty Good<br>Chance (4) | Very Good<br>Chance (5) |
| COOLMAR       | ...smoked marijuana?                                                                         | No or Very<br>Little Chance (1) | Little<br>Chance (2) | Some<br>Chance (3) | Pretty Good<br>Chance (4) | Very Good<br>Chance (5) |
| COOLGUN       | ...carried a handgun?                                                                        | No or Very<br>Little Chance (1) | Little<br>Chance (2) | Some<br>Chance (3) | Pretty Good<br>Chance (4) | Very Good<br>Chance (5) |

## PEER-INDIVIDUAL RISK FACTOR: Interaction with Antisocial Peers

PRIAP (5-point scale) |  $\alpha=0.784$

**CUT POINTS:** 6th grade (COL = 0.037; USA = 0.023) | 8th grade (COL = 0.219; USA = 0.040) | 10th grade (COL = 0.215; USA = 0.046)

| Variable Name | Question                                                                          | Scoring                   |                        |                        |                        |                        |
|---------------|-----------------------------------------------------------------------------------|---------------------------|------------------------|------------------------|------------------------|------------------------|
|               | <i><b>In the past year (12 months), how many of your best friends have...</b></i> |                           |                        |                        |                        |                        |
| FRSUS         | ...been suspended from school?                                                    | None of<br>my friends (0) | 1 of my<br>friends (1) | 2 of my<br>friends (2) | 3 of my<br>friends (3) | 4 of my<br>friends (4) |
| FRGUN         | ...carried a handgun?                                                             | None of<br>my friends (0) | 1 of my<br>friends (1) | 2 of my<br>friends (2) | 3 of my<br>friends (3) | 4 of my<br>friends (4) |
| FRSOLD        | ...sold illegal drugs?                                                            | None of<br>my friends (0) | 1 of my<br>friends (1) | 2 of my<br>friends (2) | 3 of my<br>friends (3) | 4 of my<br>friends (4) |
| FRSTL         | ...stolen or tried to steal a motor vehicle such as a<br>car or motorcycle?       | None of<br>my friends (0) | 1 of my<br>friends (1) | 2 of my<br>friends (2) | 3 of my<br>friends (3) | 4 of my<br>friends (4) |
| FRARST        | ...been arrested?                                                                 | None of<br>my friends (0) | 1 of my<br>friends (1) | 2 of my<br>friends (2) | 3 of my<br>friends (3) | 4 of my<br>friends (4) |
| FRDROP        | ...dropped out of school?                                                         | None of<br>my friends (0) | 1 of my<br>friends (1) | 2 of my<br>friends (2) | 3 of my<br>friends (3) | 4 of my<br>friends (4) |

*Note.* COL = Cut point based on the distributions of risk factors observed in the Colombian data; USA = U.S.-based cut point
